1 **Estimation of the number of general anesthesia cases based on a series of nationwide**  
2 **surveys on Twitter during COVID-19 in Japan: A statistical analysis**

3 Yosuke Fujii MD <sup>1,3</sup>, Hiroki Daijo MD, Ph.D. <sup>2,3</sup>, Kiichi Hirota MD, Ph.D. <sup>1,\*</sup>

4 <sup>1</sup> Department of Human Stress Response Science, Institute of Biomedical Science, Kansai  
5 Medical University, Hirakata, Osaka 573-1010, Japan

6 <sup>2</sup> Department of Anesthesia, Takarazuka Daiichi Hospital, Takakazuka, Hyogo 665-0832,  
7 Japan

8 <sup>3</sup> These authors contributed equally to this work

9

10 \*Corresponding author

11 Kiichi Hirota

12 Department of Human Stress Response Science, Institute of Biomedical Science, Kansai

13 Medical University, Hirakata, Osaka, Japan

14 phone: +81-72-804-2526

15 email: hif1@mac.com / khirota-kyt@umin.ac.jp

16

17 **Keywords:** Coronavirus disease 2019 (COVID-19); twitter; general anesthesia; quadratic

18 programming

19

20 **Word count: 2144**

21 **The number of tables: 2**

22 **The number of figures: 5**

23

24 **Abstract**

25 **Purpose**

26 The coronavirus disease (COVID-19), caused by severe acute respiratory syndrome  
27 coronavirus 2 (SARS-CoV-2), has spread to more than 200 other countries. In light of this  
28 situation, the Japanese Government declared a state of emergency in seven regions of Japan  
29 on April 7, 2020, under the provisions of the law. The medical care delivery system has been  
30 under pressure. Although various surgical societies have published guidelines on which to  
31 base their surgical decisions, it is not clear how general anesthesia has been performed and  
32 will be performed in Japan.

33 **Methods**

34 One of the services provided by Twitter is a voting function—Twitter Polls—through which  
35 anonymous surveys can be conducted. We used quadratic programming to analyze the results  
36 of a series of 17 surveys on Twitter, over the course of 22 weeks. The analysis focused on  
37 solving the mathematical optimizing problem on the status of operating restrictions. Public  
38 data provided by the Japanese Government were used to estimate the current changes in the  
39 number of general anesthesia performed in Japan.

40 **Results**

41 The minimum number of general anesthesia per week was estimated at 66.1%, compared to

42 2015, on April 27, 2020. The time series trend was compatible with the results reported by the

43 Japanese Society of Anesthesiologists.

44 **Conclusion** The number of general anesthesia was reduced by up to two-thirds during the

45 COVID-19 pandemic in Japan, and was quantitatively estimated using the Twitter quick

46 questionnaire.

47

48 **Introduction**

49 Coronavirus (COVID-19), caused by severe acute respiratory syndrome coronavirus 2  
50 (SARS-CoV-2), was first reported in Wuhan, Hubei, China, and has since spread to more than  
51 200 other countries around the world at the time of writing [1]. In light of this situation, the  
52 Japanese Government declared a state of emergency in seven regions of Japan on April 7,  
53 2020, under the provisions of the law. This declaration was extended to the entire nation on  
54 April 17, 2020. The incidence of pneumonia from COVID-19 is considerably higher than  
55 from seasonal influenza, and the number of cases with no identifiable route of infection has  
56 increased rapidly [2, 3]. The medical care delivery system has been under pressure [4].  
57 Emphasis should be placed on maintaining medical care systems. Although various surgical  
58 societies have published guidelines on which to base their surgical decisions  
59 (<https://www.facs.org/covid-19/clinical-guidance/elective-case>;  
60 [https://www.cms.gov/files/document/cms-non-emergent-elective-medical-](https://www.cms.gov/files/document/cms-non-emergent-elective-medical-recommendations.pdf)  
61 [recommendations.pdf](https://www.cms.gov/files/document/cms-non-emergent-elective-medical-recommendations.pdf)), it is not clear how general anesthesia has been performed.  
62 Social networks such as Twitter are becoming a part of our society, as various information is  
63 being accumulated on the Web [5]. One of the services provided is a voting function called  
64 Twitter Polls. Using this function, anonymous surveys can be conducted on Twitter in Japan  
65 [6].

66 A series of surveys were conducted on Twitter on the status of operating restrictions. We  
67 analyzed the results using quadratic programming to solve a mathematical optimizing  
68 problem. Public data provided by the Japanese Government were used to estimate and  
69 compare the current changes in the number of general anesthesia carried out in Japan. In  
70 addition, the estimated time series trend was validated to be compatible with the results of the  
71 surveys sponsored by the Japanese Society of Anesthesiologists (JSA).

72

## 73 **Methods**

### 74 **Twitter Surveys**

75 Using the Twitter account of @dajhiroki, a board-certified anesthesiologist with  
76 approximately 1,300 followers, Twitter Polls was used to conduct seventeen 24-hour surveys,  
77 which were held approximately one week apart from each other, from March 13 to August 14,  
78 2020 (Supplementary Information S1). During the period, the spread of COVID-19 had  
79 become a social problem in Japan.

80 The surveys used the same wording throughout the period, in the form of a choice of one of  
81 the following four options:

- 82 1. No surgical restrictions
- 83 2. Partial restrictions (more than half of the usual)

84 3. Extensive restrictions (less than half of the usual)

85 4. No scheduled surgery

86

### 87 **Transition of responses to the survey**

88 Suppose there were  $R = 4$  discrete categories of responses, transition between the responses

89 during the questionnaire period would be estimated (Fig. 1).  $P$  was a  $R \times R$  transition matrix

90 whose elements  $p_{ij}$  show the probability transition from the  $i$ th category at time  $t$  to the  $j$ th

91 category at time  $t + 1$ . The transition matrix was

$$P = \begin{bmatrix} p_{11} & p_{12} & p_{13} & p_{14} \\ p_{21} & p_{22} & p_{23} & p_{24} \\ p_{31} & p_{32} & p_{33} & p_{34} \\ p_{41} & p_{42} & p_{43} & p_{44} \end{bmatrix}, \quad (1)$$

92 under the constraints of

$$\left\{ \begin{array}{l} p_{13}, p_{14}, p_{24}, p_{31}, p_{41}, p_{42} = 0 \\ 0 \leq p_{11}, p_{12}, p_{21}, p_{22}, p_{23}, p_{32}, p_{33}, p_{34}, p_{43}, p_{44} \leq 1 \\ p_{11} + p_{12} = 1 \\ p_{21} + p_{22} + p_{23} = 1 \\ p_{32} + p_{33} + p_{34} = 1 \\ p_{43} + p_{44} = 1 \end{array} \right. \quad (2)$$

93 The number of the responses to the web questionnaire at time  $t$  was aggregated as the

94 proportion  $y_i(t)$ ,  $i = \{1, 2, 3, 4\}$ . When the individual transition was not available, it was not

95 possible to estimate the transition matrix from individual transition data using ordinary least

96 squares method. However, quadratic programming method could estimate the transition

97 matrix from proportional data [7]. The stochastic model of the relation between the actual

98 response counts and the estimated occurrence of  $y_i(t)$  was described below with the error

99 term  $u_j(t)$ ;

$$y_i(t+1) = \sum_i^R y_i(t)p_{ij} + u_j(t). \quad (3)$$

100 This equation could be written in linear algebraic form as follows:

$$y = Xp + u, \quad (4)$$

101 where

$$y = [y_1(1), y_1(2), \dots, y_1(t), y_2(1), y_2(2), \dots, y_2(t), \dots, y_R(1), y_R(2), \dots, y_R(t)]', \quad (5)$$

102 and

$$X_j = \begin{bmatrix} y_1(0) & y_2(0) & \dots & y_R(0) \\ y_1(1) & y_2(1) & \dots & y_R(1) \\ \vdots & \vdots & \ddots & \vdots \\ y_1(T-1) & y_2(T-1) & \dots & y_R(T-1) \end{bmatrix}, \quad (6)$$

103 for  $j = \{1, 2, 3, 4\}$  so that

$$X = \begin{bmatrix} X_1 & 0 & \dots & 0 \\ 0 & X_2 & \dots & 0 \\ \vdots & \vdots & \ddots & \vdots \\ 0 & 0 & \dots & X_R \end{bmatrix}, \quad (7)$$

$$p = [p_1(1), p_1(2), \dots, p_1(t), p_2(1), p_2(2), \dots, p_2(t), \dots, p_R(1), p_R(2), \dots, p_R(t)]', \quad (8)$$

104 and

$$u = [u_1(1), u_1(2), \dots, u_1(t), u_2(1), u_2(2), \dots, u_2(t), \dots, u_R(1), u_R(2), \dots, u_R(t)]'. \quad (9)$$



105 Estimation was performed minimizing the squared error term  $|u|^2$  as

$$\begin{aligned} |u|^2 &= (\mathbf{y} - \mathbf{Xp})^2 \\ &= |\mathbf{y}|^2 - 2\mathbf{y}'\mathbf{Xp} + \mathbf{p}'\mathbf{X}'\mathbf{Xp}. \end{aligned} \quad (10)$$

106 The objective of quadratic programming was to find a vector  $p$  that would minimize

$$\frac{1}{2}\mathbf{p}'\mathbf{X}'\mathbf{Xp} - \mathbf{y}'\mathbf{Xp}, \quad (11)$$

107 subject to

$$\mathbf{Ap} \leq \mathbf{b}, \quad (12)$$

108 with a real matrix  $A$  and a real vector  $b$  as constraints for  $p$  denoted in equation (2).

109

### 110 **The number of general anesthesia under restriction**

111 The restriction rate of the number of general anesthesia was assumed for each survey

112 response: (1) cases of no surgical restrictions were almost the same as the past statistics, (2)

113 partial restrictions was about 70% restriction rate compared to past statistics, (3) extensive

114 restrictions was about 40% restriction rate compared to past statistics, and (4) no scheduled

115 surgery was about 10% restriction rate compared to the statistics (Fig. 2). Under such

116 assumption, the restriction rate for each hospital  $h$  at week  $t$ ,  $r_{t,i,h}$  was generated from the

117 probability distribution as follows:

118 (1) for no surgical restrictive hospitals,  $r_{t,1,h}$  was generated from uniform distribution,  $U$ ,

119 ranging from 0.95 to 1.05.

$$r_{t,1,h} \sim U(0.95, 1.05), \quad (13)$$

120 (2–4) for restrictive management hospitals,  $r_{t,i,h}$ ,  $i = \{2, 3, 4\}$ , was generated from beta  
121 distribution,  $Beta(\alpha, \beta)$ . Their parameters  $(\alpha_{t,i,h}, \beta_{t,i,h})$ ,  $i = \{2, 3, 4\}$  were defined so that the  
122 means were 0.7, 0.4, and 0.1, and the variance was 0.005, respectively (Fig. 2).

$$r_{t,i,h} \sim Beta(\alpha_{t,i,h}, \beta_{t,i,h}), \quad (14)$$

123 for  $i = \{2, 3, 4\}$ . The number of general anesthesia performed at hospital  $h$  in the  $t$ th week,  
124  $R_{h,t}$ , was generated as follows:

$$R_{h,t} \sim \begin{cases} \text{round}(N_h r_{t,1,h}) & \text{if } i = 1 \\ \text{Binomial}(r_{t,i,h}, N_h) & \text{otherwise} \end{cases}, \quad (15)$$

125 where  $N_h$  is the reference number of the general anesthesia performed at each hospital (data  
126 available from e-Stat), *round* is a rounding function, and  $\text{Binomial}(p, N)$  is a binomial  
127 sampling function that performs  $N$  Bernoulli trials with probability  $p$ .

128 The survey response for each hospital at  $t = 1$  was randomly allocated to the  $i$ th response  
129 according to  $y_i(t)$ , and its status transitioned to the  $j$ th response by  $p_{ij}$ .

130 For sensitivity analysis, two other scenarios were considered. An optimistic scenario assumed  
131 relatively high performance in operating rooms, with an average of 80% for “2. Partial  
132 restrictions,” 50% for “3. Extensive restrictions,” and 25% for “4. No scheduled surgery.” A  
133 pessimistic scenario assumed extremely low performance, with an average of 50% for “2.

134 Partial restrictions,” 30% for “3. Extensive restrictions,” and 3% for “4. No scheduled  
135 surgery.”

136 Analysis and estimation were performed using the quadprog package (version 1.5.8) within  
137 the R programming language (version 3.4.4). Point estimates and their statistical uncertainty  
138 were presented as 95% confidential intervals (CI) with 1000 iteration. The data were obtained  
139 from the Japan official statistics portal site e-Stat, a public database in Japan ([https://www.e-](https://www.e-stat.go.jp/stat-search/file-download?statInfId=000031565245&fileKind=0)  
140 [stat.go.jp/stat-search/file-download?statInfId=000031565245&fileKind=0](https://www.e-stat.go.jp/stat-search/file-download?statInfId=000031565245&fileKind=0)), and were  
141 preprocessed for analysis. The code is available online  
142 (<https://github.com/yfujii08/covid19generalanesthesia>) and is available upon request from the  
143 corresponding author.

144

145 **Nationwide report of the estimation of the number of general anesthesia from the**  
146 **Japanese Society of Anesthesiologists**

147 The JSA determined the extent of the restriction of general anesthesia using questionnaires.  
148 They sent questionnaires to all authorized institutes (n=1415) from April 23, 2020,  
149 approximately every week. The proportion of the number of general anesthesia compared to  
150 2015 was estimated and disclosed to only the members of JSA  
151 ([https://anesth.or.jp/img/upload/ckeditor/files/2004\\_07\\_08.pdf](https://anesth.or.jp/img/upload/ckeditor/files/2004_07_08.pdf)).

152

153 **Ethics**

154 This study is exempted from institutional review board approval because this study does not  
155 contain human participants or research material derived from human participants.

156

157 **Results**

158 From March 13 to August 14, 2020, responses were solicited from 17 surveys almost weekly  
159 via a Twitter account (@dajhiroki) in the Japanese language, with the number of responses  
160 received per survey ranging from 47 to 288 (Supplementary Information S1). The results of  
161 the surveys are presented in Table 1.

162 In the public database e-Stat, 3501 hospitals were registered as facilities that provide general  
163 anesthesia. Of the 3311 hospitals that reported the number of general anesthesia, 1989  
164 performed more than 100 general anesthesia.

165 From the survey conducted in the first week (March 13, 2020), 89.2% had no surgical  
166 restrictions, but this proportion decreased to 24.7% in the survey conducted in the seventh  
167 week (April 27, 2020) then slightly recovered to 38.9% (May 17, 2020). The proportion  
168 increased to 87.2% (July 4, 2020) and was finally 80.0% at the end of the questionnaire  
169 administration (July 31, 2020). The proportions of partial restrictions, extensive restrictions,

170 and no scheduled surgeries were 5.4%, 3.6%, and 1.8% (March 13, 2020); 37.8%, 29.5%, and  
171 8.0% (April 27, 2020); 44.2%, 11.5%, and 5.3% (May 17, 2020); and 11%, 4%, and 5% (July  
172 31, 2020), respectively (Fig. 3). The estimated proportion of each response and its transition  
173 are shown in Fig. 3 and Table 1.

174 The number of general anesthesia performed decreased as the restrictions increased (Fig. 4  
175 and Table 2). Before COVID-19,  $4.45 \times 10^4$  cases of general anesthesia were performed per  
176 week in Japan. The number of general anesthesia ( $10^4$  per week unit) was estimated to be 4.21  
177 [95% CI: 4.16, 4.26] in the first week (March 13, 2020), 2.95 [2.87, 3.02] in the seventh week  
178 (April 27, 2020), and 4.10 [4.04, 4.16] in the last week survey (July 31, 2020) (Table 2).

179 Sensitivity analysis showed that the number of general anesthesia performed decreased  
180 according to the intensity of the restrictions (Fig. 5). In the first week survey (March 13,  
181 2020), the optimistic scenario had a median of  $4.21 \times 10^4$  /week, while pessimistic scenario  
182 had that of 4.14. In the seventh (April 27, 2020) and last week survey (July 31, 2020), the  
183 optimistic scenario medians were 3.28 and 4.19, while those of the pessimistic scenario were  
184 2.46 and 3.95, respectively. The maximum difference between optimistic and pessimistic  
185 scenarios was 1.34 folds at May 2, 2020.

186 The comparison between the estimation of this survey and the nationwide reports from the  
187 surveys of the JSA was shown in Fig. 5. The data before the end of April is missing because

188 the JSA questionnaire started from April 23, 2020. The JSA data showed a gradual decrease  
189 in the number of general anesthesia compared to 2019: 87.3%, 79.2%, and 41.1% on April 23,  
190 April 27, and May 4, respectively. After that, the number of the general anesthesia gradually  
191 recovered parallel to the estimation of this survey.

192

### 193 **Discussion**

194 It is difficult to adequately control for the level of limitation of usual surgical care during the  
195 spread of COVID-19. It is determined by adherence to official guidelines, restrictions on  
196 medical supplies and medical staff, and the level of need for surgery. However, because  
197 circumstances can change quickly, it is often determined with reference to the extent of  
198 restrictions at a medical facility other than the home facility.

199 The staged approach—recommended by the Centers for Medicare and Medicaid Services  
200 (CMS) and the American College of Surgeons (ACS)—is used as a guide to determine how to  
201 perform surgery in situations where the preservation of ventilators and personal protective  
202 equipment is necessary, and the ICU has been compromised—or is expected to be  
203 compromised soon.

204 The number of respondents to our surveys increased over time, and it is thought that the  
205 number of respondents was dependent on their knowledge of the status of operational

206 limitations. By using a series of surveys conducted through Twitter Polls, we were quickly  
207 able to determine the extent of the restrictions on surgery at medical facilities across the  
208 country about one month ahead of the survey by the JSA. By periodically soliciting responses  
209 to the same survey on Twitter, we were able to estimate the extent to which operations would  
210 be restricted nationally—over time.

211 Our methodology in this study is an estimation method that uses mathematical analysis. We  
212 used public data from a database operated by the Japanese Government. The number of  
213 hospitals accredited by the JSA is 1415. However, in this study, 1989 hospitals that perform  
214 at least 100 surgeries per year under general anesthesia were used. The number of operations  
215 performed at each hospital varies—mainly according to the size of the hospital. On the other  
216 hand, since neither the size of the hospitals to which the survey respondents belonged nor the  
217 changes in the number of operations were known, we used mathematical analysis to calculate  
218 the number of operations.

219 There are several limitations in this study. First, the number and type of survey responses is a  
220 potential limitation. It is possible that the number of anesthesiologists using Twitter was not  
221 sufficient to obtain a definitive estimation, and there may be some bias in the responses from  
222 those that do use it. Responses were low initially, with 47 in the early stages of the surveys,  
223 but increased to 288 in the latter half. The growing penetration of the surveys and increasing

224 familiarity with the issue of operating room restrictions may have contributed to an increase  
225 in participation, but this may have been biased. Second, we calculated the number of surgeries  
226 as 95% to 105% for the criteria: "1. No surgical restrictions," 70% for "2. Partial restrictions,"  
227 40% for "3. Extensive restrictions," and 10% for "4. No scheduled surgery." In the sensitivity  
228 analysis, two scenarios were assumed, but the number of general anesthesia performed could  
229 be approximately a 1.34-fold difference following the period of the surveys. Because it is  
230 difficult to estimate, accurately, the extent of restrictions, intuitive values were adopted. It  
231 needs to be compared with the descriptive statistics after the COVID-19 era.

232 In conclusion, we analyzed the results of a series of surveys on Twitter on the status of  
233 operating restrictions using quadratic programming to solve a mathematical optimizing  
234 problem. Public data provided by the Japanese Government were used to estimate and  
235 compare the current changes in the number of general anesthesia carried out in Japan. The  
236 number of general anesthesia was reduced by up to two-thirds during the COVID-19  
237 pandemic in Japan, and was quantitatively estimated using the Twitter quick questionnaire.

238

### 239 **Acknowledgements**

240 We would like to thank Editage ([www.editage.com](http://www.editage.com)) for English language editing.

241



242 **Availability of data and material**

243 All data generated or analyzed during this study are included in this published article. The  
244 datasets used and/or analyzed during the current study are available from the corresponding  
245 author on reasonable request.

246

247 **Ethics declarations**

248 This study is exempted from institutional review board approval because this study does  
249 contain no human participants, or research material derived from human participants.

250

251 **Competing interests**

252 The authors declare no competing interests.

253

254 **Funding**

255 This work was supported by a research grant from the Kansai Medical University (KMU)  
256 research consortium to K.H., the branding program as a world-leading research university on  
257 intractable immune and allergic diseases from MEXT Japan.

258

259

260 **References**

- 261 1. Zhu N, Zhang D, Wang W, Li X, Yang B, Song J, et al. A Novel Coronavirus from  
262 Patients with Pneumonia in China, 2019. *N Engl J Med.* 2020;382:727-33; doi:  
263 10.1056/NEJMoa2001017.
- 264 2. Guan WJ, Ni ZY, Hu Y, Liang WH, Ou CQ, He JX, et al. Clinical Characteristics of  
265 Coronavirus Disease 2019 in China. *N Engl J Med.* 2020;382:1708-20; doi:  
266 10.1056/NEJMoa2002032.
- 267 3. Meselson M. Droplets and Aerosols in the Transmission of SARS-CoV-2. *N Engl J*  
268 *Med.* 2020; 382: 2063 doi: 10.1056/NEJMc2009324.
- 269 4. Zarzaur BL, Stahl CC, Greenberg JA, Savage SA, Minter RM. Blueprint for  
270 Restructuring a Department of Surgery in Concert With the Health Care System During a  
271 Pandemic: The University of Wisconsin Experience. *JAMA Surg.* 2020; 155: 628-35 doi:  
272 10.1001/jamasurg.2020.1386.
- 273 5. Aramaki E, Maskawa S, Morita M. Twitter Catches The Flu: Detecting Influenza  
274 Epidemics using Twitter. *Proceedings of the Conference on Empirical Methods in Natural*  
275 *Language Processing.* 2011:1568–76.
- 276 6. Sang E, Bos J. Predicting the 2011 Dutch Senate Election Results with Twitter.  
277 *Proceedings of the Workshop on Semantic Analysis in Social Media.* 2012:53–60.

278 7. Matthew T. Jones. Estimating Markov Transition Matrices Using Proportions Data:

279 An Application to Credit Risk. International Monetary Fund; 2005. No. 5-219.

280

281

282 **Tables**

283 Table 1: Results of the Twitter surveys. The sum did not necessarily equal to 100% due to  
 284 rounding.

| Date of survey (2020)       | 3/13 | 3/20 | 3/27 | 4/6 | 4/10 | 4/17 | 4/27 | 5/2 | 5/9 | 5/17 | 5/22 | 6/19 | 7/4 | 7/24 | 7/31 | 8/7 | 8/14 |
|-----------------------------|------|------|------|-----|------|------|------|-----|-----|------|------|------|-----|------|------|-----|------|
| Number of votes             | 112  | 47   | 73   | 160 | 221  | 232  | 288  | 184 | 93  | 113  | 54   | 157  | 86  | 142  | 100  | 77  | 107  |
| 1. No surgical restrictions | 89%  | 77%  | 82%  | 64% | 46%  | 27%  | 25%  | 29% | 41% | 39%  | 46%  | 78%  | 87% | 80%  | 80%  | 87% | 82%  |
| 2. Partially restricted     | 5%   | 17%  | 7%   | 23% | 38%  | 38%  | 38%  | 40% | 37% | 44%  | 41%  | 19%  | 10% | 16%  | 11%  | 10% | 8%   |
| 3. Extensively restricted   | 4%   | 2%   | 4%   | 7%  | 13%  | 27%  | 30%  | 23% | 19% | 12%  | 9%   | 2%   | 2%  | 1%   | 4%   | 1%  | 1%   |
| 4. No scheduled surgery     | 2%   | 4%   | 7%   | 6%  | 3%   | 8%   | 7%   | 8%  | 3%  | 5%   | 4%   | 1%   | 0%  | 4%   | 5%   | 1%  | 8%   |

285

286 Table 2 : Estimated number of general anesthesia ( $10^4$  cases per week) in Japan during the

| 2020  | 3/13 | 3/20 | 3/27 | 4/6  | 4/10 | 4/17 | 4/27 | 5/2  | 5/9  | 5/17 | 5/22 | 6/19 | 7/4  | 7/24 | 7/31 | 8/7  | 8/14 |
|-------|------|------|------|------|------|------|------|------|------|------|------|------|------|------|------|------|------|
| 2.5%  | 4.16 | 4.03 | 4.02 | 3.97 | 3.71 | 3.22 | 2.87 | 2.88 | 3.11 | 3.27 | 3.38 | 3.75 | 4.14 | 4.15 | 4.04 | 4.11 | 4.16 |
| 50%   | 4.21 | 4.09 | 4.08 | 4.03 | 3.78 | 3.30 | 2.95 | 2.95 | 3.19 | 3.34 | 3.45 | 3.82 | 4.19 | 4.19 | 4.10 | 4.16 | 4.21 |
| 97.5% | 4.26 | 4.14 | 4.14 | 4.08 | 3.84 | 3.36 | 3.02 | 3.03 | 3.26 | 3.42 | 3.52 | 3.88 | 4.23 | 4.24 | 4.16 | 4.21 | 4.25 |

287 period of the surveys.

288

289

290 **Figure Legends**

291 Figure 1: Transition scheme of the proportion of surveys. (1: green) no surgical restrictions,  
292 (2: yellow) partial restrictions, (3: orange) extensive restrictions, and (4: red) no scheduled  
293 surgery.  $p_{ij}$  is the transition probability from response  $i$  to response  $j$ .

294

295 Figure 2: Distribution of the degree of restriction for each response group. The mean  
296 percentages of the restrictions were generated from probability distributions. In particular, no  
297 surgical restrictions (green) were generated from the uniform distribution  $U(0.95,1.05)$ , while  
298 partial restrictions (yellow), extensive restrictions (orange), and no scheduled surgery (red)  
299 were generated from the beta distribution,  $Beta(\alpha,\beta)$ . The set of parameters for beta  
300 distribution,  $(\alpha,\beta)$ , were defined so that the respective means were 0.7, 0.4, and 0.1, and the  
301 variances were 0.005.

302

303 Figure 3: Transition of the proportion of responses to the survey. The solid line was the  
304 estimated transition and the dots were actual data.

305

306 Figure 4: Estimation of the number of general anesthesia in Japan from the survey results.

307 The violinplots show the distribution of the estimated number of general anesthesia

308 performed at 1,989 hospitals in Japan.

309

310 Figure 5: Estimation of the number of general anesthesia in Japan from the results of the

311 surveys for the three scenarios, as a sensitivity analysis and comparison between the

312 estimation of the number of general anesthesia and the report from the Japanese Society of

313 Anesthesiologists (JSA). The JSA reported the results of the estimated number of the general

314 anesthesia from 1415 authorized institutes from April 23, 2020.

315

316 **Additional information**

317 Supplementary Information S1

It is made available under a [CC-BY-NC-ND 4.0 International license](https://creativecommons.org/licenses/by-nc-nd/4.0/) .

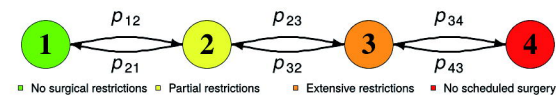

It is made available under a [CC-BY-NC-ND 4.0 International license](https://creativecommons.org/licenses/by-nc-nd/4.0/) .

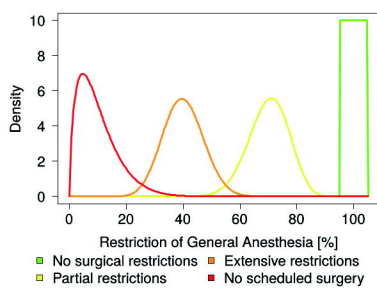



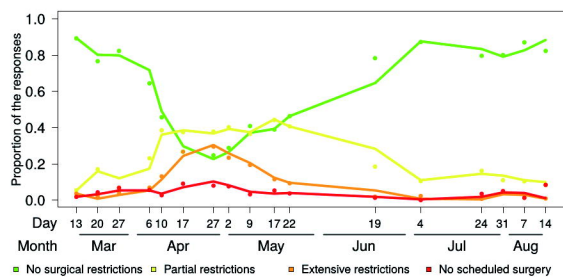

It is made available under a [CC-BY-NC-ND 4.0 International license](https://creativecommons.org/licenses/by-nc-nd/4.0/) .

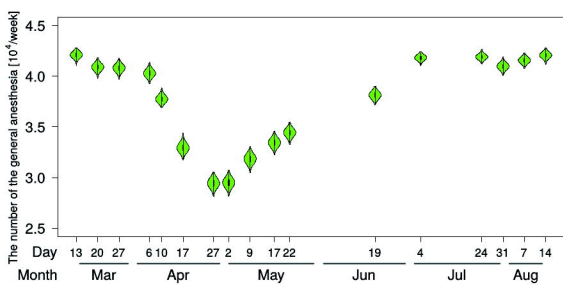

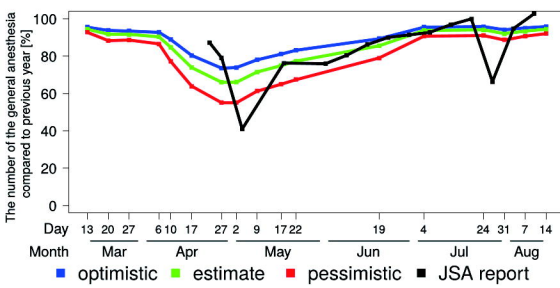

Source: https://medrxiv.org/content/10.1101/2020.05.08.20094979v3.full.pdf
